# Supplementary material for: Factors determining the toxicity of engineered nanomaterials to Tetrahymena thermophila in freshwater: the critical role of organic matter
Source: Royal Society of Chemistry journal article supplement (doi:10.1039/c9en01017c), 2019-12-06
Supplement: c9en01017c1.pdf [file c9en01017c1.pdf]

## Supporting Information

### Factors determining the toxicity of engineered nanomaterials to *Tetrahymena thermophila* in freshwater: the critical role of organic matter

Dingyuan Liang<sup>†</sup>, Xiangrui Wang<sup>†</sup>, Shu Liu<sup>†</sup>, Ying Zhu<sup>†</sup>, Ying Wang<sup>†</sup>, Wenhong  
Fan<sup>†,‡,\*1</sup> Zhaomin Dong<sup>†</sup>

#### The accumulation of MWCNTs in *T. thermophila*

The accumulation of MWCNTs in *T. thermophila* was measured by sodium dodecyl sulfate-polyacrylamide gel electrophoresis (SDS-PAGE)<sup>1, 2</sup>. Cell pellets were homogenized with 0.2mL solution containing 1% SDS, 1 mM MgCl<sub>2</sub> and 1 mM CaCl<sub>2</sub> by using an ultrasonic cell processor. Then, the homogenate was incubated at 37°C for 2 h. Next, the homogenate was treated with 20 µg deoxyribonuclease I at 37 °C for 2 h to further degrade the DNA and reduce the viscosity. Next, the homogenate was centrifuged at 16,000rpm for 20min, and the precipitate was resuspended with 0.2mL 20% glycerin. The samples were added to the wells of gel, and a 100 V electric current was constantly operated for 1 h. Finally, the optical images of the gels were taken.

#### TEM imaging of *T. thermophila*<sup>3</sup>

After 6 h exposure, the agglomerated nanomaterials in the exposure medium were removed by centrifugation at 1000rpm for 1min. And the cells exposed to nanomaterials alone were collected by centrifugation at 2500rpm for 5min and

---

\*Corresponding author: School of Space and Environment, Beihang University NO.37 Xueyuan Road, Haidian District Beijing 100191, P.R. China Tel: (86)-10-61716810; Fax: (86)-10-82339571; E-mail: [fanwh@buaa.edu.cn](mailto:fanwh@buaa.edu.cn)

<sup>†</sup>School of Space and Environment, Beihang University, Beijing 100191, P.R. China

<sup>‡</sup>Beijing Advanced Innovation Center for Big Data-Based Precision Medicine, Beihang University, Beijing 100191, P.R. China

Electronic supplementary information (ESI) available

resuspended with 1mL PBS containing 2.5% v/v glutaraldehyde and fixated overnight. Then the cells were stained using osmium acid (1%) for 2 h and then carefully washed with 0.1 mol/L PBS (pH 7.0) for 3 times. The cell pellets were dehydrated with gradually increasing ethanol gradient and acetone. Next, the cell pellets were embedded at 70 °C for 12 h, and the embedded block was cut into ultrathin sections of 70-90 nm and placed on the copper grid and stained with lead citrate and 4% uranium dioxide acetate for 10 min respectively. Finally, the distribution of nanoparticles in cells was observed by TEM (Hitachi H7650, Japan) at 120 kV.

#### **The determination of ROS content using 2',7'-dichlorodihydrofluorescein diacetate**

*T. thermophila* in ultrapure water was incubated with a 25 µmol/L solution of H<sub>2</sub>DCF-DA for 15 min at 25 °C before being exposed to nanomaterials. After incubation, the exposed solution containing the fluorescence probe was removed by centrifugation at 2500 rpm for 5 min, and the collected cells were subsequently washed with ultrapure water two times. Then, the cells were resuspended to 1 x 10<sup>6</sup> cells/mL in freshwater and mixed with the exposed medium. After 6 h exposure, the agglomerated nanomaterials in the exposure medium were removed by centrifugation at 1000 rpm for 1 min. The exposure medium was removed by centrifugation at 2500 rpm for 5 min and the cell pellets were resuspended with 1 mL freshwater. The fluorescence spectrum of dichlorofluorescein (DCF) was determined on a fluorescent spectrometer (F-7000, HITACHI, Japan) at Ex/Em = 485/523 nm. The results are presented as the value of the exposure group divided by the control group in freshwater.

#### **The determination of MDA content by thiobarbituric acid (TBA) method<sup>4</sup>**

After 6 h exposure, the exposed medium was removed by centrifugation as before and the cells were broken with 1 mL PBS in an ice bath for 1 min using an ultrasonic cell processor. The homogenate was centrifuged at 16,000 rpm for 20 min, and the supernatant was used for subsequent experiments. Next, the MDA contents and protein concentrations of the samples were measured by using MDA and total protein quantitative assay kits (Nanjing Jiancheng Bioengineering Institute, China)

following the manufacturer's instructions.

#### **The determination of cell membrane damage using ethidium bromide**

After 6 h exposure, the exposed medium was removed by centrifugation as before. Then, the cell pellets were incubated with 1 mL freshwater containing 1 mg/L EB for 20 min at 25 °C at 80 rpm. After incubation, the exposure medium was removed by centrifugation at 2500 rpm for 5 min and the cells were carefully washed with 1 mL PBS twice. Next, the cell pellets were resuspended in 1 mL freshwater, and the fluorescence spectrum was determined on a fluorescent spectrometer at Ex/Em = 510/600 nm. The results are presented as the value of the exposure group divided by the control group in freshwater.

#### **The determination of lysosomal membrane damage using neutral red**

After 6 h exposure, the exposed medium was removed by centrifugation as before. Next, the collected cells were incubated with 0.5 mL of a 500 mg/L NR solution for 5 min at 25 °C. After incubation, the exposure medium was removed by centrifugation at 2500 rpm for 5 min and the cells were carefully washed with 1 mL PBS twice. The cell pellets were fixed with 0.5 mL of a fixative containing 1% v/v formaldehyde and 10 g/L CaCl<sub>2</sub>. NR was extracted from the lysosomes by adding 0.5 mL of a lysate solution containing 1% v/v acetic acid and 50% v/v ethanol. The solution was placed overnight and then centrifugated at 16,000G for 5 min, and the absorbance of the supernatant was determined at 570 nm. The results are presented as the value of the control group divided by the exposure group in freshwater.

**Table S1** the components of Artificial, moderately hard freshwater

|                      | NaHCO <sub>3</sub> | CaSO <sub>4</sub> | MgSO <sub>4</sub> | KCl |
|----------------------|--------------------|-------------------|-------------------|-----|
| Concentration (mg/L) | 72                 | 35.6              | 45                | 3   |

**Table S2** Physicochemical properties of PS NPs and fPS NPs in the absence or presence of organic matter. \*represents  $p < 0.05$  compared to the control group in fresh water without organic matter

| <b>Samples</b> | <b>Particle size (nm)</b> | <b>Surface coating</b> | <b>Organic matter</b> | <b>Hydrodynamic diameters (nm)</b> | <b>Zeta Potential (mV)</b> |
|----------------|---------------------------|------------------------|-----------------------|------------------------------------|----------------------------|
| <b>PS NPs</b>  | 50                        | None                   | None                  | $48.27 \pm 0.99$                   | $- 21.33 \pm 1.50$         |
|                |                           |                        | HA                    | $51.12 \pm 0.89^*$                 | $- 18.33 \pm 0.86^*$       |
|                |                           |                        | BSA                   | $49.23 \pm 0.71$                   | $- 18.63 \pm 1.20^*$       |
|                |                           |                        | DB                    | $50.34 \pm 0.76^*$                 | $- 18.70 \pm 0.36^*$       |
| <b>fPS NPs</b> | 51                        | None                   | None                  | $51.88 \pm 0.23$                   | $- 22.93 \pm 1.70$         |
|                |                           |                        | HA                    | $51.91 \pm 0.59$                   | $- 23.73 \pm 1.60$         |
|                |                           |                        | BSA                   | $52.84 \pm 0.15^*$                 | $- 23.90 \pm 0.66$         |
|                |                           |                        | DB                    | $52.17 \pm 0.33$                   | $- 24.27 \pm 0.71$         |

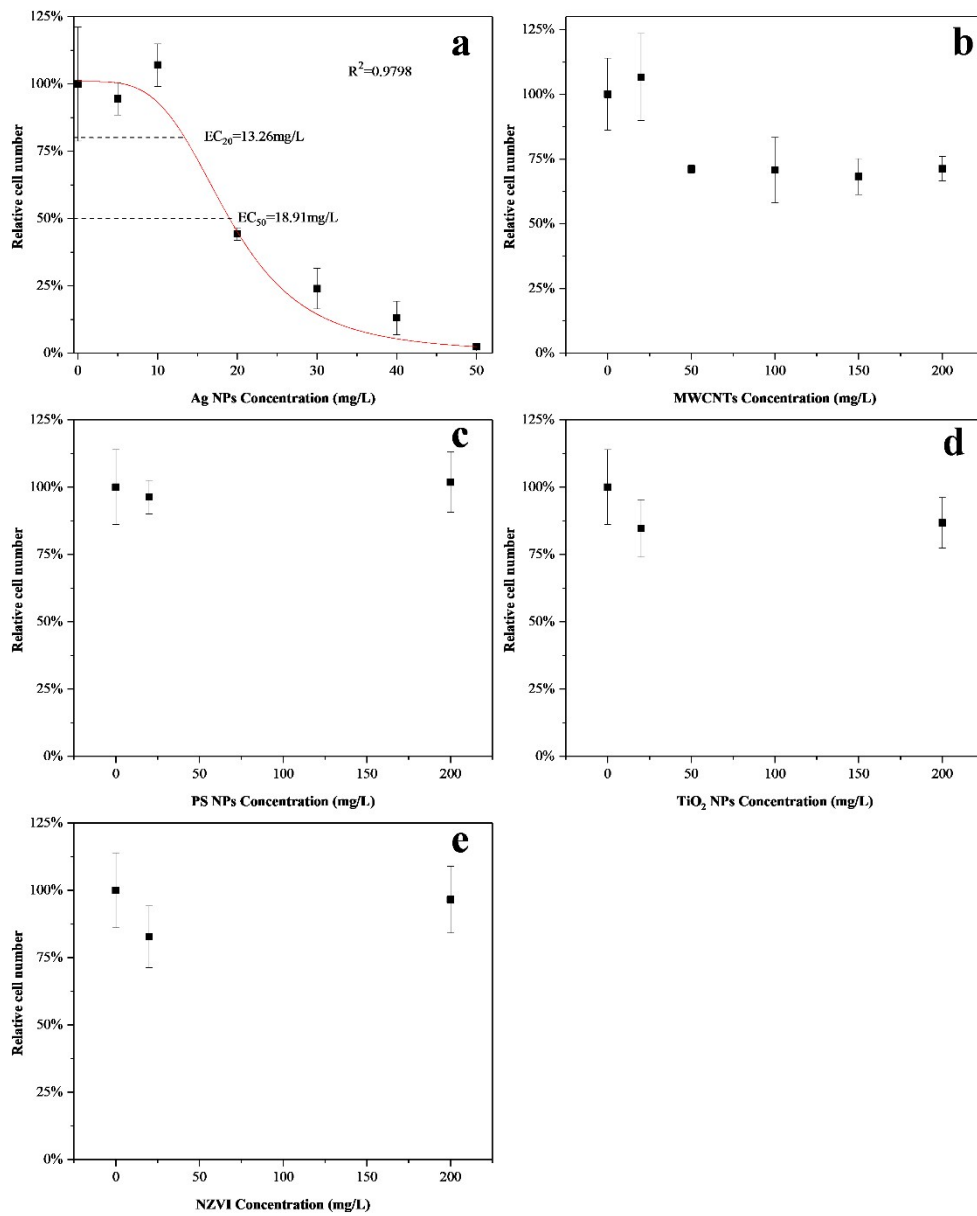

**Figure S1** Mortality of *T. thermophila* in the presence of different: a) Ag NPs, b) MWCNTs, c) PS NPs, d)  $TiO_2$  NPs, e) NZVI concentrations. Values are means  $\pm$  S (n = 3).  $EC_{20}$  and  $EC_{50}$  of Ag NPs for *T. thermophila* were determined using a logistic model by Origin 10.

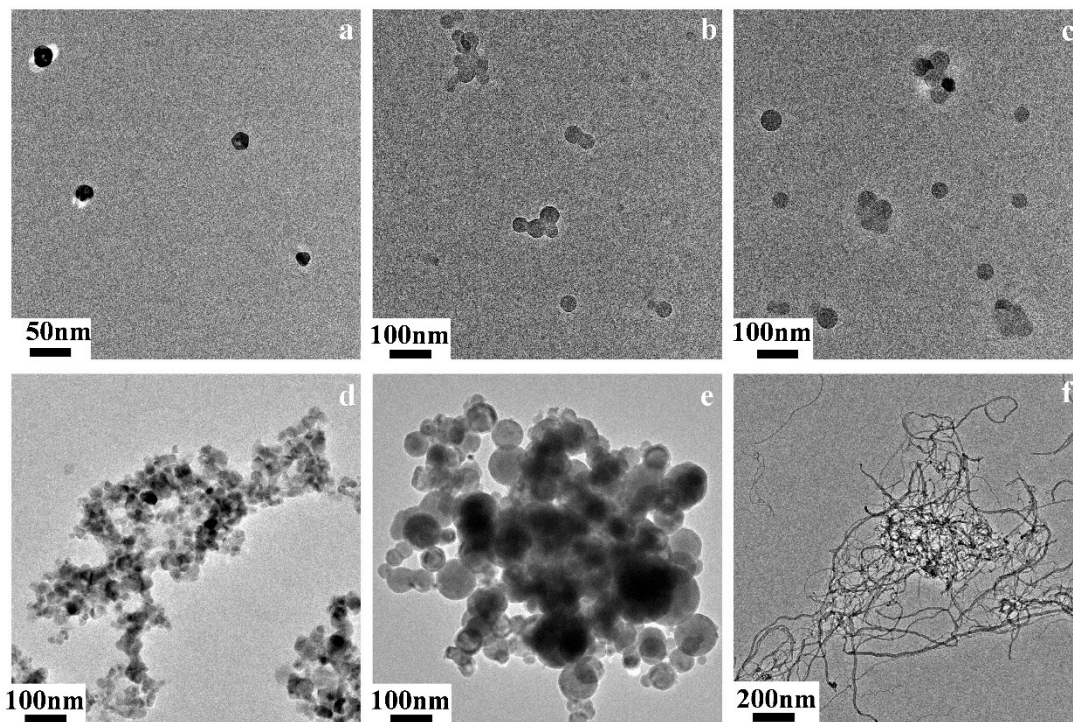

**Figure S2** TEM images of nanomaterials in freshwater: a) 5 mg/L Ag NPs, b) 200 mg/L PS NPs, c) 200 mg/L fPS NPs, d) 200 mg/L TiO<sub>2</sub> NPs, e) 200 mg/L NVZI and f) 20 mg/L MWCNTs





**Table S3** Ion dissolution proportion of nanomaterials after 12 h incubation.

| <b>Samples</b>             | <b>Elements</b>    | <b>None</b> | <b>+HA</b> | <b>+BSA</b> | <b>+DB</b> |
|----------------------------|--------------------|-------------|------------|-------------|------------|
| <b>Determination</b>       |                    |             |            |             |            |
| <b>Ag NPs</b>              | Ag                 | 1.97±0.13%  | 2.22±0.27% | 1.69±0.08%  | 1.89±0.24% |
| <b>NZVI</b>                | Fe                 | -           | -          | -           | -          |
| <b>TiO<sub>2</sub> NPs</b> | Ti                 | -           | -          | -           | -          |
| <b>PS NPs</b>              | Ni, Mn, Cu, Cr, Cd | -           | -          | -           | -          |
| <b>fPS NPs</b>             | Ni, Mn, Cu, Cr, Cd | -           | -          | -           | -          |
| <b>MWCNT</b>               | Ni, Mn, Cu, Cr, Cd | -           | -          | -           | -          |
| <b>s</b>                   |                    |             |            |             |            |

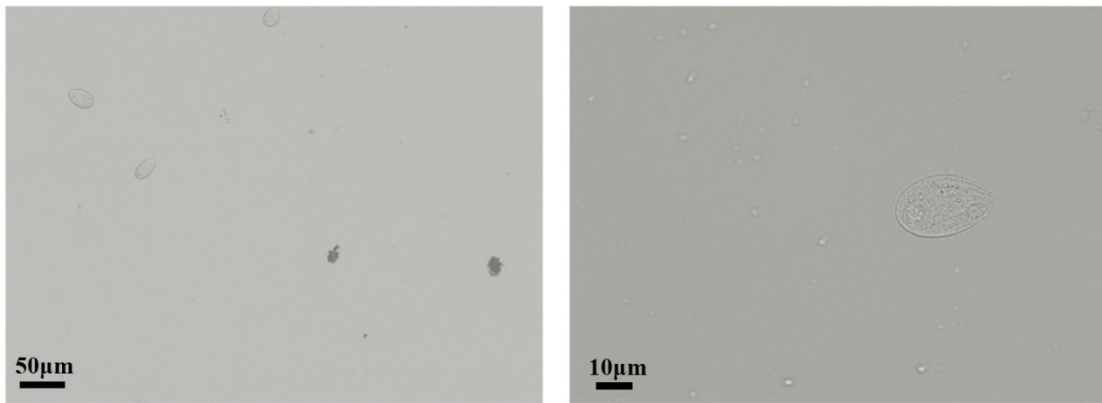

**Figure S4** Bright field images of *T. thermophila* exposed to MWCNTs for 6 h.

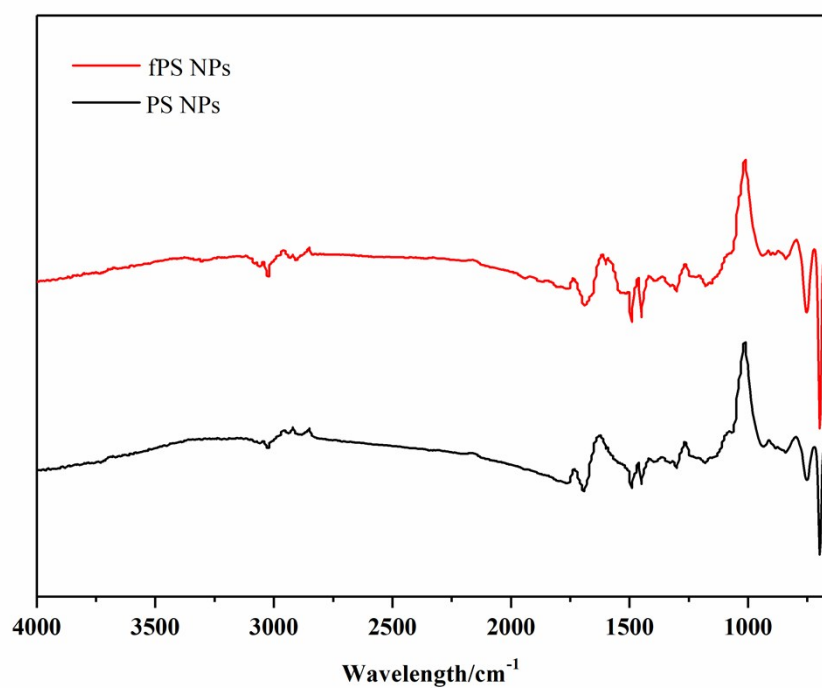

**Figure S5** Infrared spectra of of PS NPs and fPS NPs

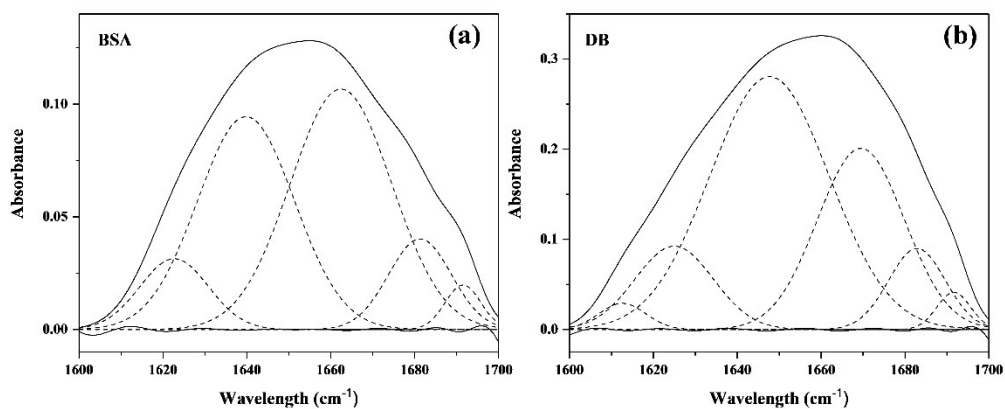

**Figure S6** Infrared spectra of: a) BSA, b) DB in the amide I together with the best fitted individual component bands. full and dotted lines indicate the experimental data and fitting Gaussian components, respectively.

**Table S4** Infrared spectra peak analysis of BSA and DB in the amide I

| Samples | Center<br>wavelength<br>(cm <sup>-1</sup> ) | Peak Area<br>Proportion<br>(%) | Samples | Center<br>wavelength<br>(cm <sup>-1</sup> ) | Peak Area<br>Proportion<br>(%) |
|---------|---------------------------------------------|--------------------------------|---------|---------------------------------------------|--------------------------------|
| BSA     | 1623                                        | 8.50                           | DB      | 1613                                        | 2.04                           |
|         | 1640                                        | 36.09                          |         | 1625                                        | 10.93                          |
|         | 1662                                        | 42.74                          |         | 1648                                        | 50.78                          |
|         | 1681                                        | 9.94                           |         | 1669                                        | 26.47                          |
|         | 1692                                        | 2.73                           |         | 1683                                        | 7.70                           |
| -       | -                                           | -                              | 1692    | 2.07                                        |                                |

1. W. H. Fan, Y. Y. Liu, Z. Z. Xu, X. R. Wang, X. M. Li and S. L. Luo, The mechanism of chronic toxicity to *Daphnia magna* induced by graphene suspended in a water column, *Environ Sci-Nano*, 2016, **3**, 1405-1415.
2. R. Wang, C. Mikoryak, E. Chen, S. Li, P. Pantano and R. K. Draper, Gel Electrophoresis Method to Measure the Concentration of Single-Walled Carbon Nanotubes Extracted from Biological Tissue, *Analytical Chemistry*, 2009, **81**, 2944-2952.
3. X. R. Wang, D. Y. Liang, Y. Wang, Q. Q. Ma, B. S. Xing and W. H. Fan, Effects of organic matter on uptake and intracellular trafficking of nanoparticles in *Tetrahymena thermophila*, *Environ Sci-Nano*, 2019, **6**, 2116-2128.
4. S. Z. Jiang, Z. B. Yang, W. R. Yang, J. Gao, F. X. Liu, J. Broomhead and F. Chi, Effects of purified zearalenone on growth performance, organ size, serum metabolites, and oxidative stress in postweaning gilts, *J Anim Sci*, 2011, **89**, 3008-3015.
